# Supplementary material for: Development of a DNA aptamer selection method based on the heterogeneous sandwich form and its application in a colorimetric assay for influenza A virus detection
Source: Royal Society of Chemistry journal article supplement (doi:10.1039/c8nj06458j), 2019-01-01
Supplement: c8nj06458j1.pdf [file c8nj06458j1.pdf]

## **Supplementary material**

### **Development of DNA aptamer selection method based on Heterogeneous sandwich form, and its application to Colorimetric assay for detection of Influenza A virus**

Juyoung Kang, Gyuho Yeom, Su-Ji Ha, Min-Gon Kim\*

Department of Chemistry, School of Physics and Chemistry, Gwangju Institute of Science and Technology (GIST),  
123 Cheomdangwagi-ro, Buk-gu, Gwangju, 61005, Republic of Korea

\* Corresponding author.

M.-G. Kim: Tel: +82-62-715-3330; Fax: +82-62-715-3419; E-mail address: mkim@gist.ac.kr

## Contents

|                                                                                            |    |
|--------------------------------------------------------------------------------------------|----|
| 1. Primers and aptamer candidates obtained by H-sandwich SELEX (Table S1) .....            | S3 |
| 2. Conditions of H-sandwich SELEX (Table S2) .....                                         | S4 |
| 3. Elution profile of aptamers selection (Figure S1) .....                                 | S5 |
| 4. Predicted secondary structure of aptamer candidates (Figure S2) .....                   | S6 |
| 5. Binding affinity of aptamer candidates in heterogeneous sandwich form (Figure S3) ..... | S7 |
| 6. Performance of antibody-based colorimetric assay (Figure S4) .....                      | S8 |

**Table S1.** Primers and aptamer candidates obtained by H-sandwich SELEX.

| <b>5'→3'</b> | <b>Forward primer</b>       | <b>Sequence</b>                    | <b>Reverse primer</b>       |
|--------------|-----------------------------|------------------------------------|-----------------------------|
| INFA-apt1    | TAGGGAAGAGAAGGACAT<br>ATGAT | GCACGTGCACCCGCACATG<br>TAGCACAGGGA | TCAAGTGGTCATGTACT<br>AGTCAA |
| INFA-apt2    | TAGGGAAGAGAAGGACAT<br>ATGAT | TGGCTTGCATGCTGGACTTC<br>CTACTGGTTT | TCAAGTGGTCATGTACT<br>AGTCAA |
| INFA-apt3    | TAGGGAAGAGAAGGACAT<br>ATGAT | CCATTGCAGTACGATGACGT<br>GTGTGTGGGA | TCAAGTGGTCATGTACT<br>AGTCAA |
| INFA-apt4    | TAGGGAAGAGAAGGACAT<br>ATGAT | GGCGTACGGGGATGAGGTG<br>ATCGTAGTGGG | TCAAGTGGTCATGTACT<br>AGTCAA |

**Table S2.** The conditions for aptamers selection. Reactions were performed in 10 rounds with decreasing ssDNA concentration (nmol) and incubation time (min).

| Selection round | ssDNA (pmol) | Incubation time (min) |
|-----------------|--------------|-----------------------|
| 1               | 1000         | 60                    |
| 2-4             | 20           | 40                    |
| 5-7             | 10           | 30                    |
| 8-10            | 4            | 30                    |

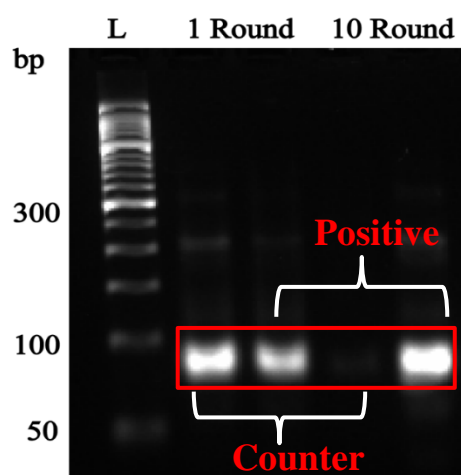

**Figure S1.** Comparison between the PCR products of ssDNA bound to targets (lane 2 and 4) and ssDNA bound to antibody-BSA (lane 1 and 3) in 1<sup>st</sup> and 10<sup>th</sup> selection round.

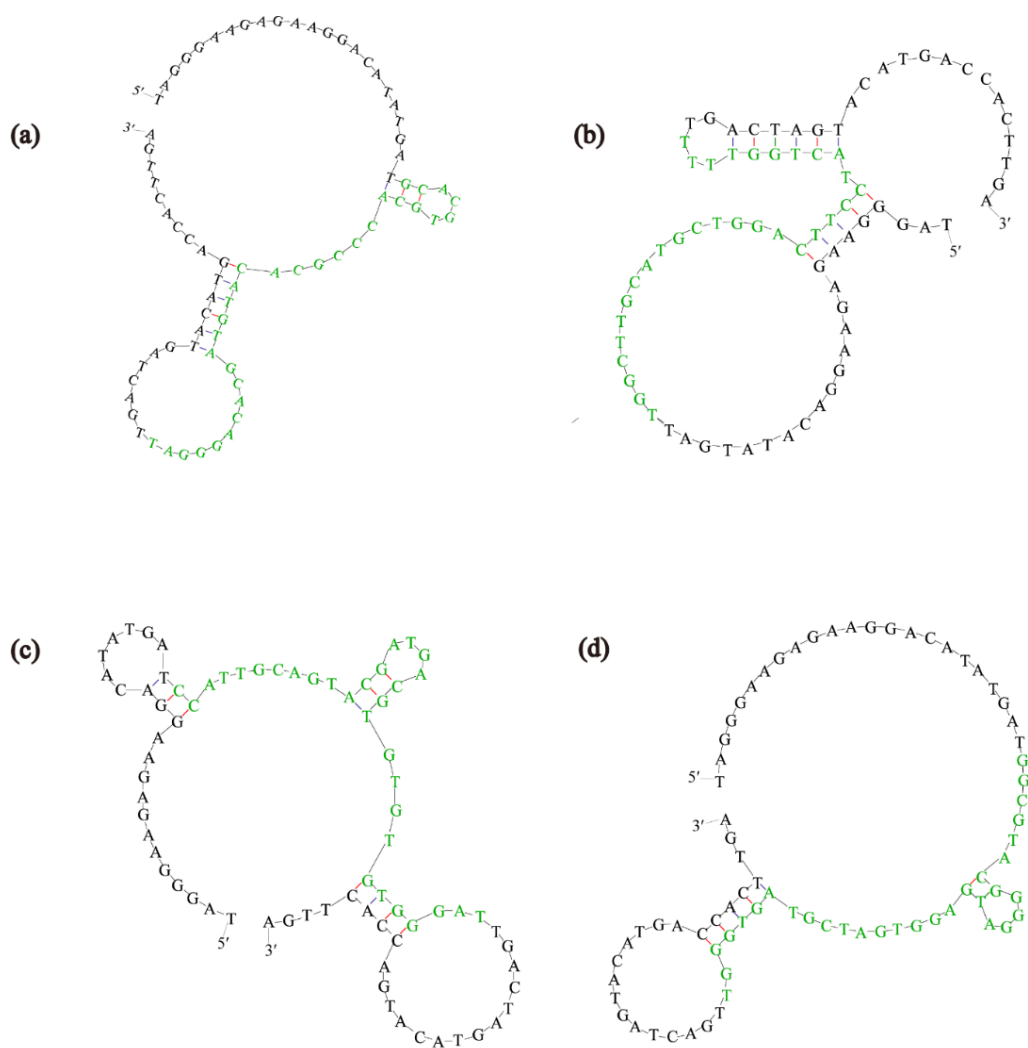

**Figure S2.** Predicted secondary structure of aptamer candidates obtained by H-sandwich SELEX (a-d). Portion predicted to bind to the antibody-antigen complex (green) and that to the linear structure (black).

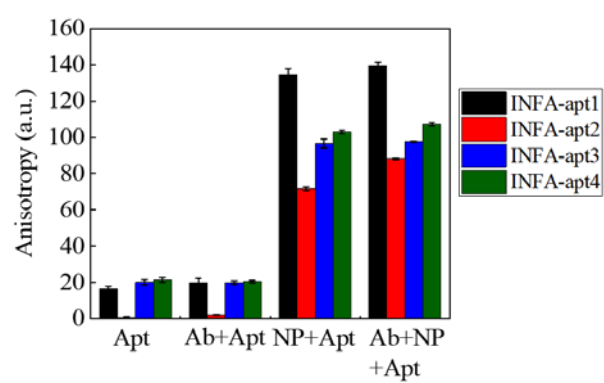

**Figure S3.** Binding affinity of aptamer candidates in heterogeneous sandwich form with fluorescence polarization.

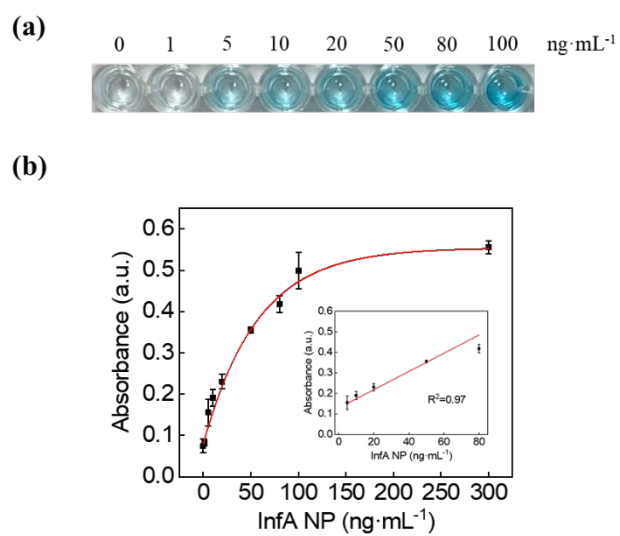

**Figure S4.** Antibody-based colorimetric assay with the sandwich form. Detection limit of the InfA NP, as determined by the naked eye (a) and titration curve (b). Inset: the absorption is a linear correlation with the concentration of InfA NP in the range from 5 to  $80 \text{ ng} \cdot \text{mL}^{-1}$  ( $y=0.00444x+0.12918$ ,  $R^2=0.97$ ). Error bars show the standard deviation of three experiments.
